# Supplementary material
Source: ML conference proceedings conference paper supplement (https://proceedings.neurips.cc/paper_files/paper/2021/hash/7a6a6127ff85640ec69691fb0f7cb1a2-Abstract.html)
Supplement: Supplementary file 1 [file 7a6a6127ff85640ec69691fb0f7cb1a2-Supplemental.pdf]

## A Benchmark Pairs Details

In Appendix A.1 we discuss the details of high-dimensional benchmark pairs. Appendix A.2 is devoted to Celeba  $64 \times 64$  images benchmark pairs.

### A.1 High-dimensional Benchmark Pairs

The benchmark creation example is given in Figure 1. In each dimension we fix random Gaussian mixtures  $\mathbb{P}, \mathbb{Q}_1, \mathbb{Q}_2$  (in the code we hard-code the random seeds) and use them to create a benchmark.

To generate a random mixture of  $M$  Gaussian measures in dimension  $D$ , we use the following procedure. Let  $\delta, \sigma > 0$  (we use  $\delta = 1, \sigma = \frac{2}{5}$ ) and consider the  $M$ -dimensional grid

$$G = \left\{ -\frac{\delta \cdot M}{2} + i \cdot \delta \text{ for } i = 1, 2, \dots, M \right\}^D \subset \mathbb{R}^D.$$

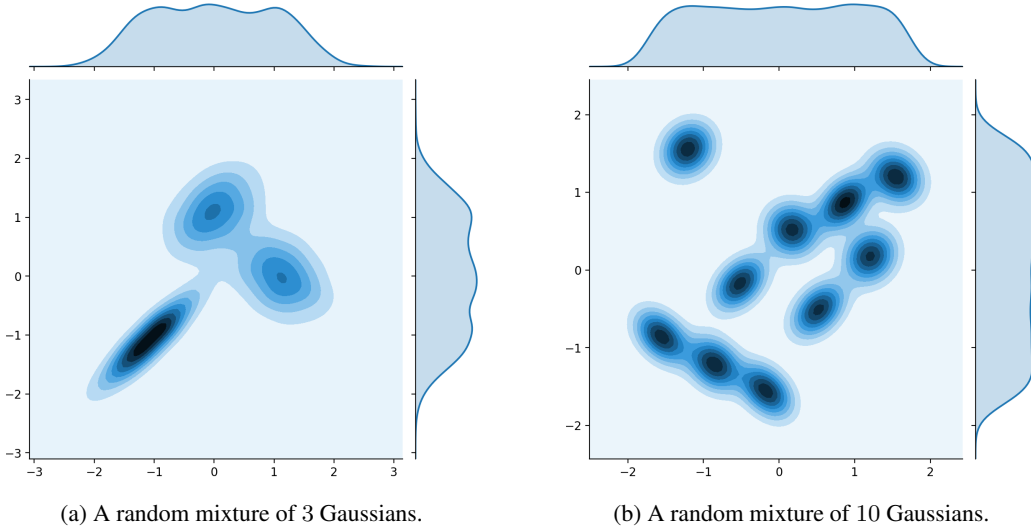

Figure 6: Randomly generated Gaussian mixtures. Projection on to first two dimensions.

We pick  $M$  random points  $\mu'_1, \dots, \mu'_M \in G$  such that no pair of points has any shared coordinate. We initialize random  $A'_1, \dots, A'_M \in \mathbb{R}^{D \times D}$ , where each row of each matrix is randomly sampled from  $D - 1$  dimensional sphere in  $\mathbb{R}^D$ . Let  $\Sigma'_m = \sigma^2 \cdot (A'_m) \cdot (A'_m)^\top$  for  $m = 1, 2, \dots, M$  and note that  $[\Sigma'_m]_{dd} = \sigma^2$  for  $d = 1, 2, \dots, D$ . Next, we consider the Gaussian mixture  $\frac{1}{M} \sum_{m=1}^M \mathcal{N}(\mu'_m, \Sigma'_m)$ . Finally, we normalize the mixture to have axis-wise variance equal to 1, i.e. we consider the final mixture  $\frac{1}{M} \sum_{m=1}^M \mathcal{N}(\mu_m, \Sigma_m)$ , where  $\mu_m = a\mu'_m$  and  $\Sigma_m = a^2\Sigma'_m$ . The value  $a \in \mathbb{R}_+$  is given by

$$a^{-1} = \sqrt{\frac{\sum_{m=1}^M \|\mu'_m\|^2}{M \cdot D} + \sigma^2}.$$

Gaussian mixtures created by the procedure have  $D$  same nice marginals, see Figure 6.

### A.2 CelebA $64 \times 64$ Images Benchmark Pairs

We fit 3 generative models on CelebA64 aligned faces dataset with a 128-dimensional latent Gaussian measure to sample from their distribution, using WGAN-QC [19] with a ResNet generator network. For trials  $k = 1, 2$ , we keep generator checkpoints after 1000, 5000, 10000 iterations to produce measures  $\mathbb{Q}_{\text{Early}}^k, \mathbb{Q}_{\text{Mid}}^k, \mathbb{Q}_{\text{Late}}^k$  respectively. In the last trial  $k = 3$ , we keep only the final generator network checkpoint after 50000 iterations which produces measure  $\mathbb{P}_{\text{Final}}^3$ . To make each of measures absolutely continuous, we add white Normal noise (axis-wise  $\sigma = 0.01$ ) to the generators' output.

We use the generated measures to construct images benchmark pairs according to the pipeline described in §4.1. We visualize the pipeline in Figure 2.

## B Experimental Details

In Appendix B.1, we discuss the neural network architectures we used in experiments. All the other training hyperparameters are given in Appendix B.2.

### B.1 Neural Network Architectures

In Table 4 below, we list all the neural network architectures we use in continuous OT solvers. In every experiment we pre-train networks to satisfy  $\nabla\psi_\theta(x) = x - \nabla f_\theta(x) \approx x$  and  $H_\omega(y) \approx y$  at the start of the optimization. We empirically noted that such a strategy leads to more stable optimization.

| Solver             | High-dimensional benchmark                                                                                                                            | CelebA benchmark                                                                                                                                | CelebA image generation |
|--------------------|-------------------------------------------------------------------------------------------------------------------------------------------------------|-------------------------------------------------------------------------------------------------------------------------------------------------|-------------------------|
| [LS]               | $\psi_\theta, \phi_\omega : \mathbb{R}^D \rightarrow \mathbb{R}$ - DenseICNN (U)                                                                      |                                                                                                                                                 | N/A                     |
| [MM-B]             | $\psi_\theta : \mathbb{R}^D \rightarrow \mathbb{R}$ - DenseICNN (U)                                                                                   | $f_\theta : \mathbb{R}^D \rightarrow \mathbb{R}$ - ResNet                                                                                       |                         |
| [QC]               | $\psi_\theta : \mathbb{R}^D \rightarrow \mathbb{R}$ - DenseICNN (U)                                                                                   | $f_\theta : \mathbb{R}^D \rightarrow \mathbb{R}$ - ResNet                                                                                       |                         |
| [MM]               | $\psi_\theta : \mathbb{R}^D \rightarrow \mathbb{R}$ - DenseICNN (U)<br>$H_\omega : \mathbb{R}^D \rightarrow \mathbb{R}^D$ - $\nabla$ of DenseICNN (U) | $f_\theta : \mathbb{R}^D \rightarrow \mathbb{R}$ - ResNet<br>$H_\omega : \mathbb{R}^D \rightarrow \mathbb{R}^D$ - UNet                          |                         |
| [MM:R]             | $T_\theta : \mathbb{R}^D \rightarrow \mathbb{R}^D$ - $\nabla$ of DenseICNN (U)<br>$\phi_\omega : \mathbb{R}^D \rightarrow \mathbb{R}$ - DenseICNN (U) | $T_\theta : \mathbb{R}^D \rightarrow \mathbb{R}^D$ - UNet<br>$g_\omega : \mathbb{R}^D \rightarrow \mathbb{R}$ - ResNet                          |                         |
| [MMv1]             | $\psi_\theta : \mathbb{R}^D \rightarrow \mathbb{R}$ - DenseICNN                                                                                       |                                                                                                                                                 | N/A                     |
| [MMv2]<br>[W2]     | $\psi_\theta : \mathbb{R}^D \rightarrow \mathbb{R}$ - DenseICNN<br>$H_\omega : \mathbb{R}^D \rightarrow \mathbb{R}^D$ - $\nabla$ of DenseICNN         | $\psi_\theta : \mathbb{R}^D \rightarrow \mathbb{R}$ - ConvICNN64<br>$H_\omega : \mathbb{R}^D \rightarrow \mathbb{R}^D$ - $\nabla$ of ConvICNN64 |                         |
| [MMv2:R]<br>[W2:R] | $T_\theta : \mathbb{R}^D \rightarrow \mathbb{R}^D$ - $\nabla$ of DenseICNN<br>$\phi_\omega : \mathbb{R}^D \rightarrow \mathbb{R}$ - DenseICNN         | $T_\theta : \mathbb{R}^D \rightarrow \mathbb{R}^D$ - $\nabla$ of ConvICNN64<br>$\phi_\omega : \mathbb{R}^D \rightarrow \mathbb{R}$ - ConvICNN64 |                         |

Table 4: Network architectures we use to parametrize potential  $f$  (or  $\psi$ ) and map  $H$  in tested solvers. In the reversed solvers we parametrize second potential  $g$  (or  $\phi$ ) and forward transport map  $T$  by neural networks.

In the **high-dimensional benchmark**, we use DenseICNN architecture from [16, §B.2]. It is a fully-connected neural net with additional input-quadratic skip-connections. This architecture can be made input-convex by limiting certain weights to be non-negative. We impose such as a restriction only for [MMv1],[MMv2],[W2] solvers which require networks to be input-convex. In other cases, the network has no restrictions on weights and we denote the architecture by DenseICNN (U). In experiments, we use the implementation of DenseICNN from the official repository of [W2] solver

<https://github.com/iamalexkorotin/Wasserstein2GenerativeNetworks>

More precisely, in the experiments with probability measures on  $\mathbb{R}^D$ , we use

$$\text{DenseICNN}[1; \max(2D, 64), \max(2D, 64), \max(D, 32)].$$

Here 1 is the rank of the input-quadratic skip connections and the other values define sizes of fully-connected layers the sequential part of the network. The notation follows [16, §B.2].

We emphasize that DenseICNN architecture  $\psi_\theta$  has differentiable CELU [4] activation functions. Thus,  $\nabla\psi_\theta$  is well-defined. In particular, artificial  $\beta \cdot \|x\|^2/2$  for  $\beta = 10^{-4}$  is added to the output of the last layer of the ICNN. This makes  $\psi_\theta$  to be  $\beta$ -strongly convex. As the consequence,  $\nabla\psi_\theta$  is a bijective function with Lipschitz constant lower bounded by  $\beta$ , see the discussion in [16, §B.1].

In the **experiments with CelebA images**, for parametrizing the potential  $f = f_\theta : \mathbb{R}^D \rightarrow \mathbb{R}$  in [MM], [QC], [MM-B], we use ResNet architecture from the official WGAN-QC [19] repository:

<https://github.com/harryliaw/WGAN-QC>

To parametrize the map  $H = H_\omega : \mathbb{R}^D \rightarrow \mathbb{R}^D$  in [MM] solver, we use UNet architecture from

<https://github.com/milesial/Pytorch-UNet>

In [MMv2], [W2] solvers we parametrize  $\psi = \psi_\theta$  and  $H = H_\omega = \nabla\phi_\omega$ , where both  $\psi_\theta, \phi_\omega$  have ConvICNN64 architecture, see Figure 7. We artificially add  $\beta \cdot \|x\|^2/2$  (for  $\beta = 10^{-4}$ ) to the output of the output of the ConvICNN64 to make its gradient bijective.

In the architecture, *PosConv2D* layers are usual 2D convolutional layers with all weights (except biases) restricted to be non-negative. *Conv2D-CQ* (convex quadratic) are fully convolutional blocks

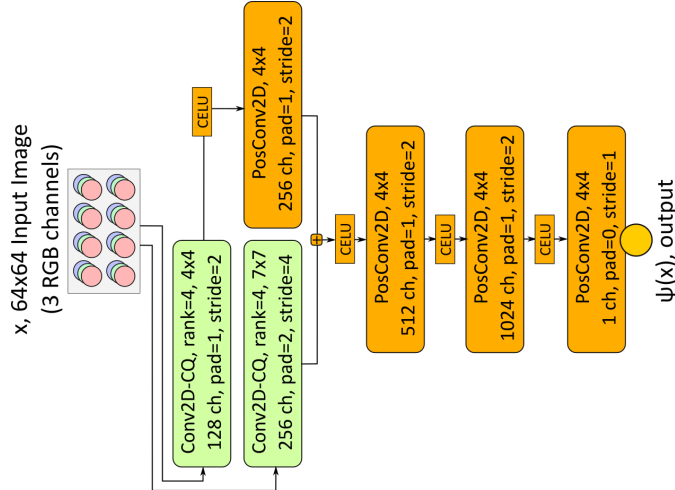

Figure 7: Convolutional ICNN architecture we use for processing  $64 \times 64$  RGB images.

which output a tensor whose elements are input-quadratic functions of the input tensor. In Figure 8, we present the architecture of Conv2D-CQ block. Here, *GroupChannelSumPool* operation corresponds to splitting the tensor per channel dimension into  $n_{out}$  sequential sub-tensors (each of  $r$  channels) and collapsing each sub-tensor into one 1-channel tensor by summing  $r$  channel maps. The layer can be viewed as the convolutional analog of *ConvexQuadratic* dense layer proposed by [16, §B.2].

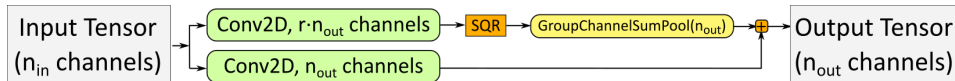

Figure 8: 2D convolutional convex quadratic block.

In the **CelebA image generation experiments**, we also use ResNet architecture for the generator network  $g$ . The implementation is taken from WGAN-QC repository mentioned above.

## B.2 Hyperparameters and Implementation Details

The evaluation of all the considered continuous solvers for evaluation is not trivial for two reasons. First, not all the solvers have available user-friendly *Python* implementations. Next, some solvers are not used outside the GAN setting. Thus, for considering them in the benchmark, proper extraction of the  $\mathbb{W}_2$  solver (discriminator part) from the GAN is needed.

We implement most of the solvers from scratch. In all the cases, we use Adam optimizer [15] with default hyperparameters (except the learning rate). For solvers [QC] by [19] and [W2] by [16] we use the code provided by the authors in the official papers' GitHub repositories.

### B.2.1 High-dimensional Benchmark Pairs

We report the hyper parameters we use in high-dimensional benchmark in Table 5. *Total iterations* column corresponds to optimizing the potential  $f_\theta$  (or  $\psi_\theta$ ) to *maximize* the dual form (8). In maximin solvers, there is also an inner cycle which corresponds to solving the inner *minimization* problem in (8). The hyperparameters are chosen empirically to best suit the considered evaluation setting.

For [QC] solver large batch sizes are computationally infeasible since it requires solving a linear program at each optimization step [19, §3.1]. Thus, we use batch size 64 as in the original paper. [W2] solver is used with the same hyperparameters in training/evaluation of the benchmarks.

### B.2.2 CelebA $64 \times 64$ Images Benchmark Pairs

For the images benchmark, we list the hyperparameters in Table 6.

| Solver      | Batch Size | Total Iterations | LR        | Note                                                                                                                              |
|-------------|------------|------------------|-----------|-----------------------------------------------------------------------------------------------------------------------------------|
| [LS]        | 1024       | 100000           | $10^{-3}$ | Quadratic regularization<br>with $\epsilon = 3 \cdot 10^{-2}$ , see [36, Eq. (7)]                                                 |
| [MM-B]      | 1024       | 100000           | $10^{-3}$ | None                                                                                                                              |
| [QC]        | 64         | 100000           | $10^{-3}$ | OT regularization<br>with $K = 1, \gamma = 0.1$ , see [19, Eq. (10)]                                                              |
| [MMv1]      | 1024       | 20000            | $10^{-3}$ | 1000 gradient iterations ( $lr = 0.3$ )<br>to compute argmin in (8), see [39, §6].<br>Early stop when gradient norm $< 10^{-3}$ . |
| [MM],[MMv2] | 1024       | 50000            | $10^{-3}$ | 15 inner cycle iterations to update $H_\omega$ ,<br>( $K = 15$ in the notation of [26, Algorithm 1])                              |
| [W2]        | 1024       | 250000           | $10^{-3}$ | Cycle-consistency regularization,<br>$\lambda = D$ , see [16, Algorithm 1]                                                        |

Table 5: Hyperparameters of solvers we use in high-dimensional benchmark. Reversed are not presented in this table: they use the same hyperparameters as their original versions.

| Solver | Batch Size | Total Iterations | LR                | Note                                                                                               |
|--------|------------|------------------|-------------------|----------------------------------------------------------------------------------------------------|
| [MM-B] | 64         | 20000            | $3 \cdot 10^{-4}$ | None                                                                                               |
| [QC]   | 64         | 20000            | $3 \cdot 10^{-4}$ | OT regularization<br>with $K = 1, \gamma = 0.1$ , see [19, Eq. (10)]                               |
| [MM]   | 64         | 50000            | $3 \cdot 10^{-4}$ | 5 inner cycle iterations to update $H_\omega$ ,<br>( $K = 5$ in the notation of [26, Algorithm 1]) |
| [W2]   | 64         | 50000            | $3 \cdot 10^{-4}$ | Cycle-consistency regularization,<br>$\lambda = 10^4$ , see [16, Algorithm 1]                      |

Table 6: Hyperparameters of solvers we use in CelebA images benchmark.

### B.2.3 CelebA $64 \times 64$ Images Generation Experiment

To train a generative model, we use GAN-style training: generator network  $G_\alpha$  updates are alternating with OT solver’s updates (discriminator’s update). The learning rate for the generator network is  $3 \cdot 10^{-4}$  and the total number of generator iterations is 50000.

In [QC] solver we use the code by the authors: there is one gradient update of OT solver per generator update. In all the rest methods, we alternate 1 generator update with 10 updates of OT solver (*iterations* in notation of Table 6). All the rest hyperparameters match the previous experiment.

The generator’s gradient w.r.t. parameters  $\alpha$  on a mini-batch  $z_1, \dots, z_N \sim \mathbb{S}$  is given by

$$\partial \mathbb{W}_2^2(\mathbb{P}_\alpha, \mathbb{Q}) / \partial \alpha = \int_z \mathbf{J}_\alpha G_\alpha(z)^T \nabla f^*(G_\alpha(z)) d\mathbb{S}(z) \approx \frac{1}{N} \sum_{n=1}^N \mathbf{J}_\alpha G_\alpha(z_n)^T \nabla f_\theta(G_\alpha(z_n)) \quad (10)$$

where  $\mathbb{S}$  is the latent space measure and  $f_\theta$  is the current potential (discriminator) of OT solver. Note that in [MM:R] potential  $f$  is not computed but the forward OT map  $T_\theta$  is parametrized instead. In this case, we estimate the gradient (10) on a mini-batch by  $\frac{1}{N} \sum_{n=1}^N \mathbf{J}_\alpha G_\alpha(z_n)^T (\text{id}_{\mathbb{R}^D} - T_\theta)$ .
